# Supplementary material
Source: HighWire-hosted journal article supplement (https://bmjopenquality.bmj.com/highwire/filestream/135965/field_highwire_adjunct_files/0/ds3515.docx)

**Appendix: Baseline & Follow-up Measurements**


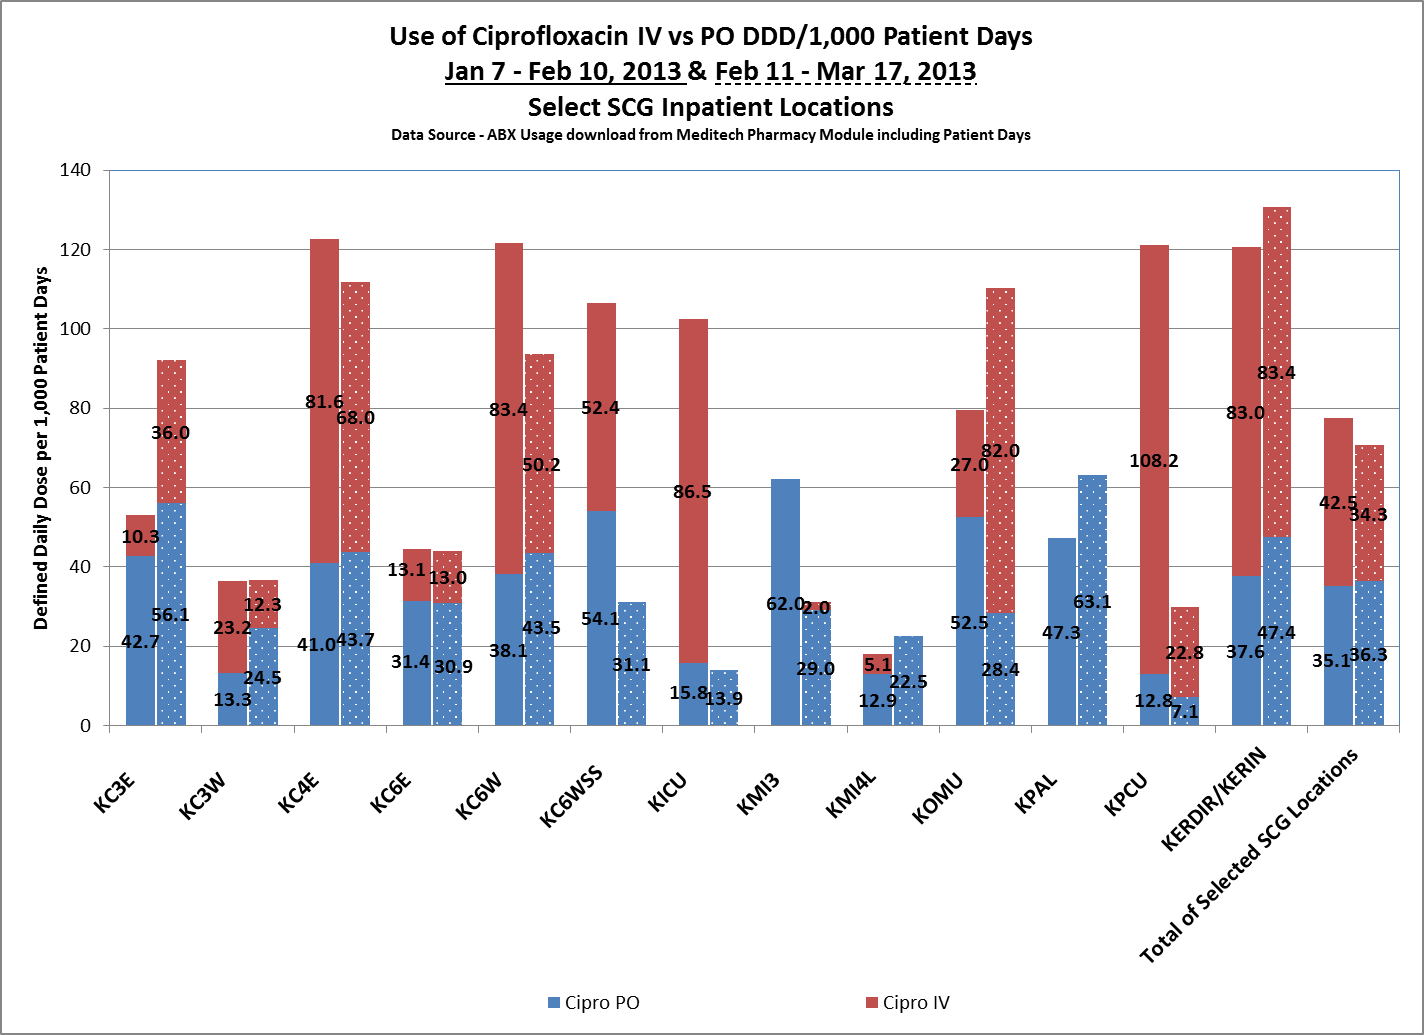


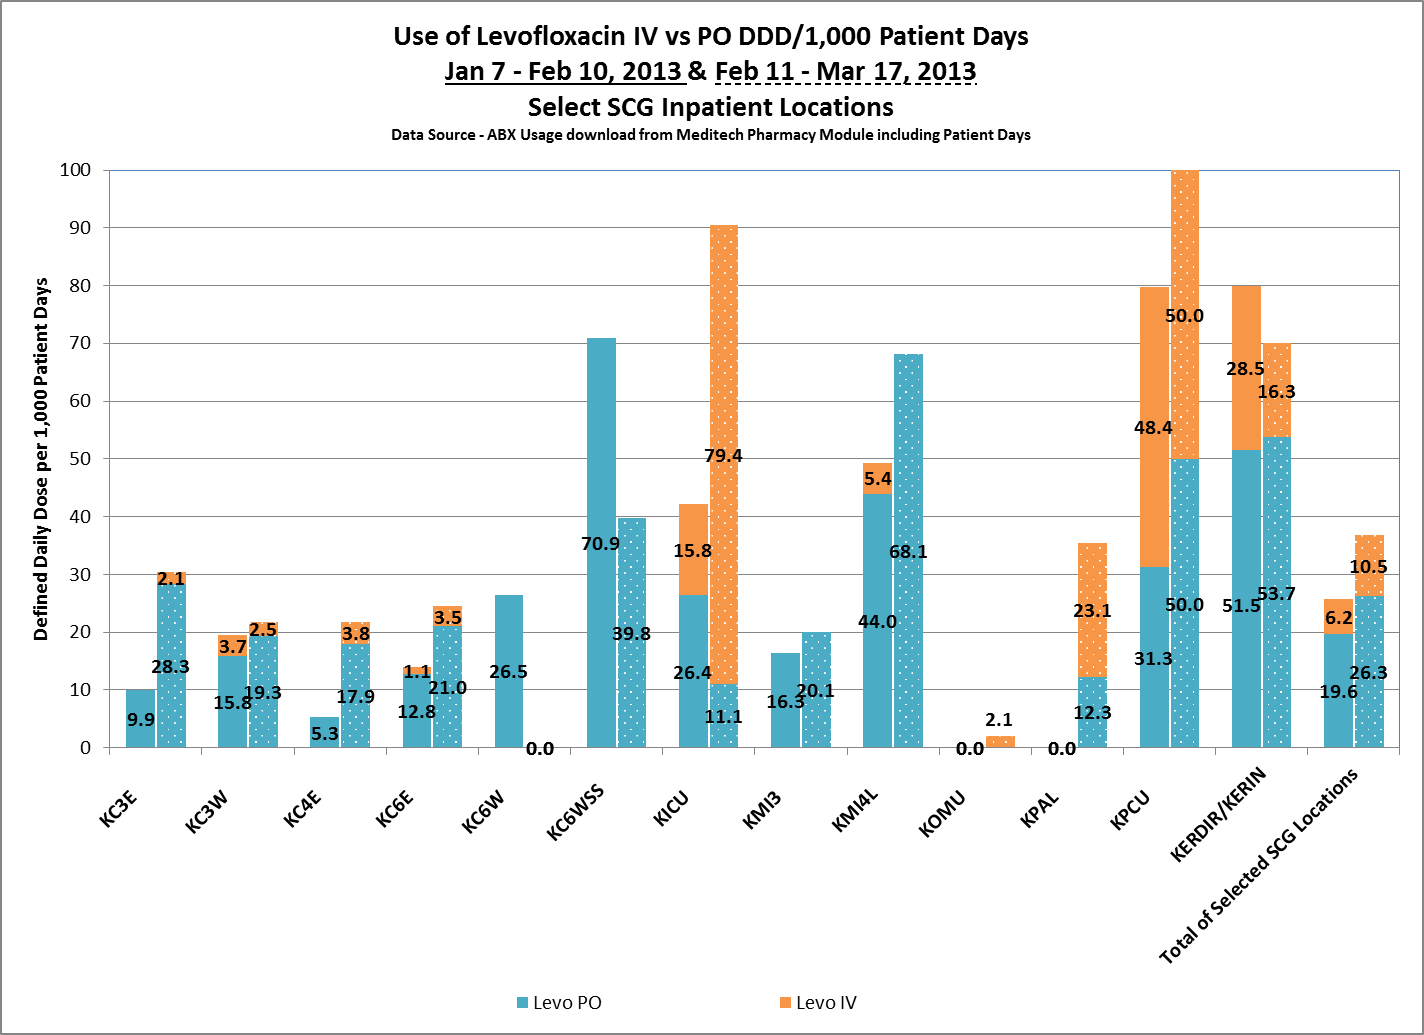


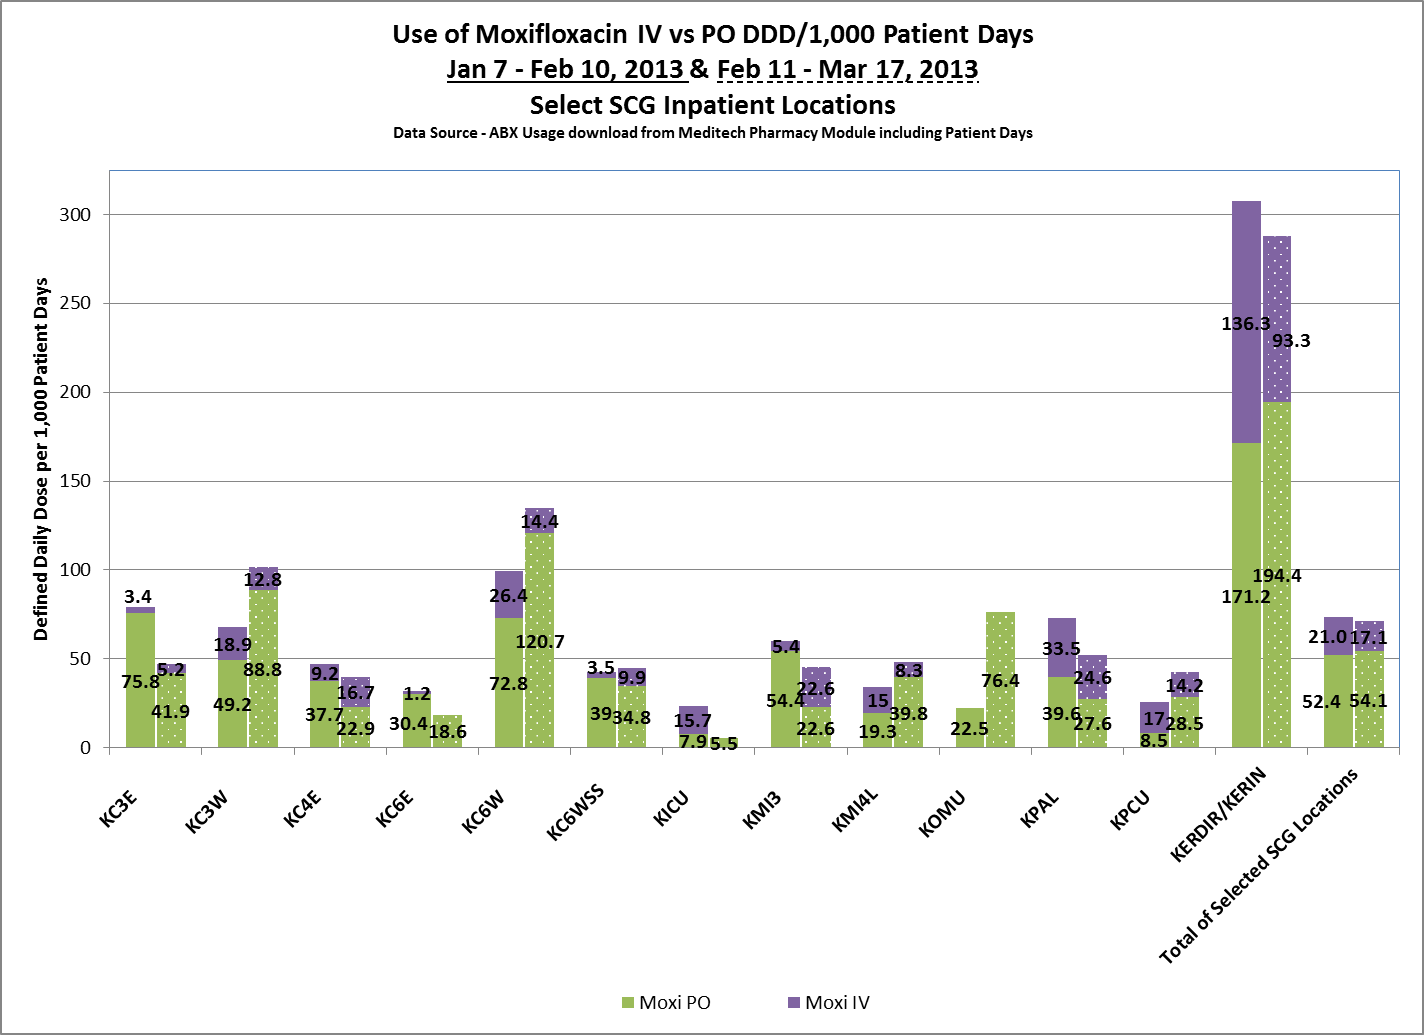


**
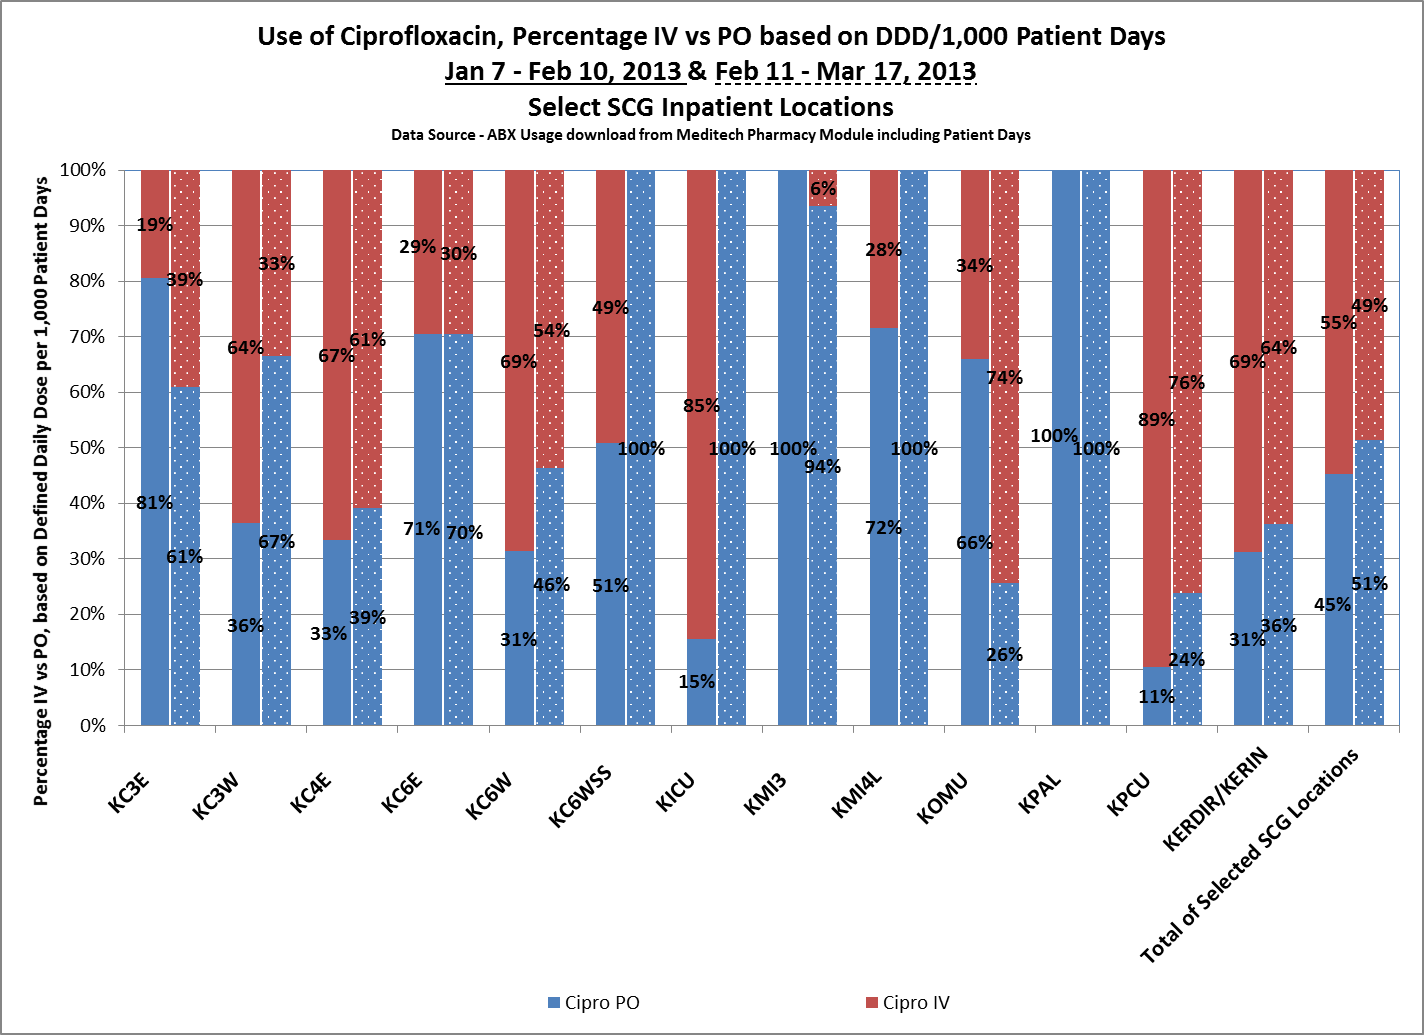
**

**
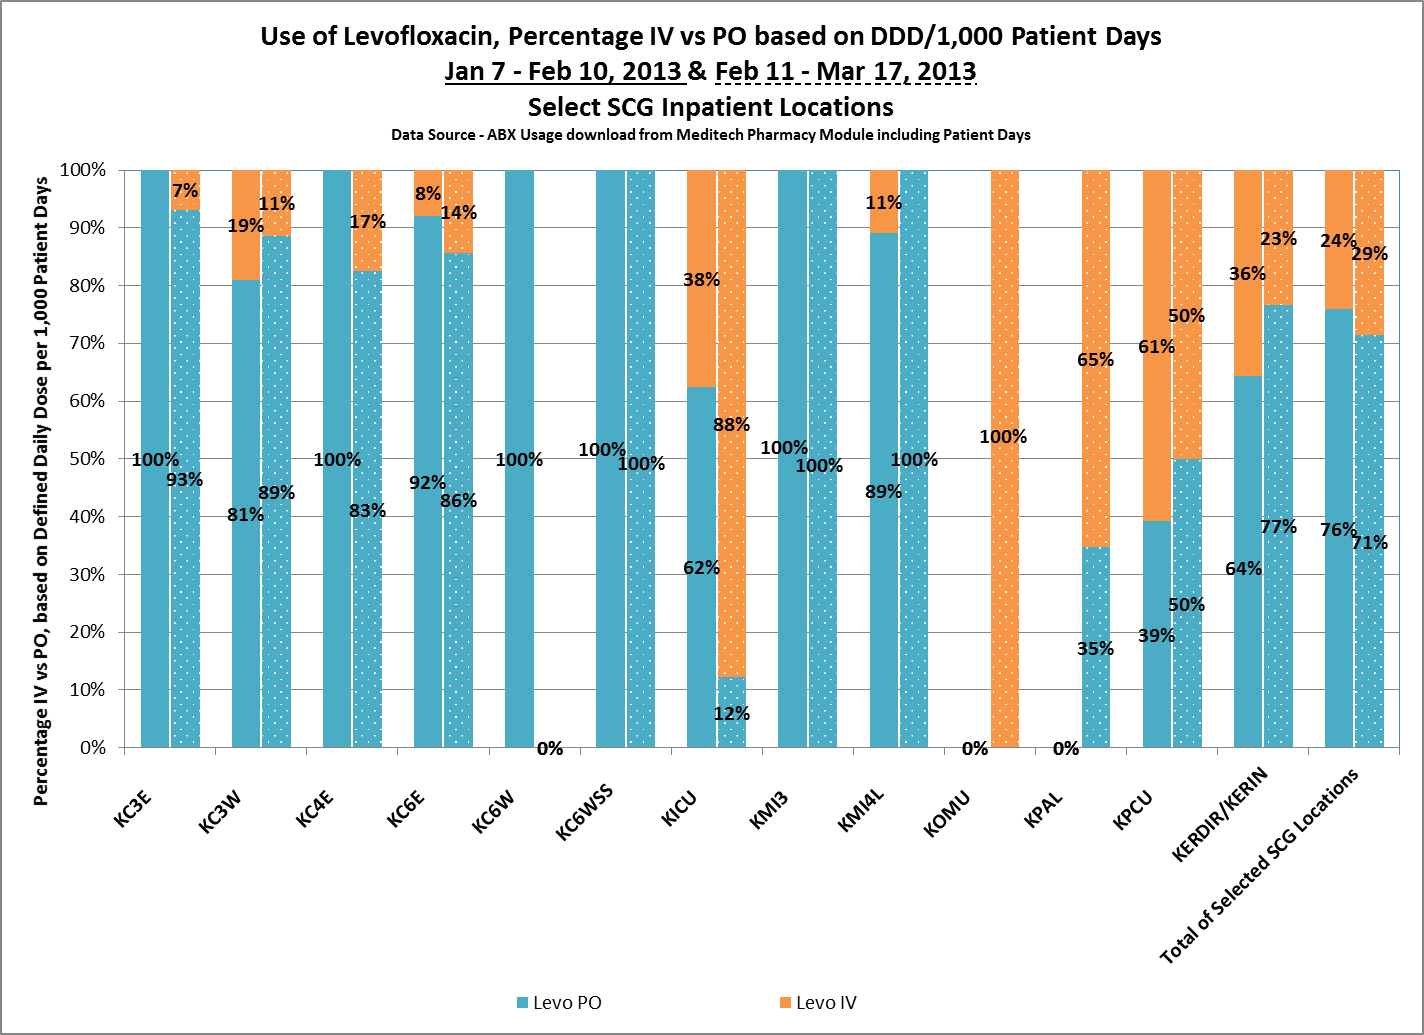
**

**
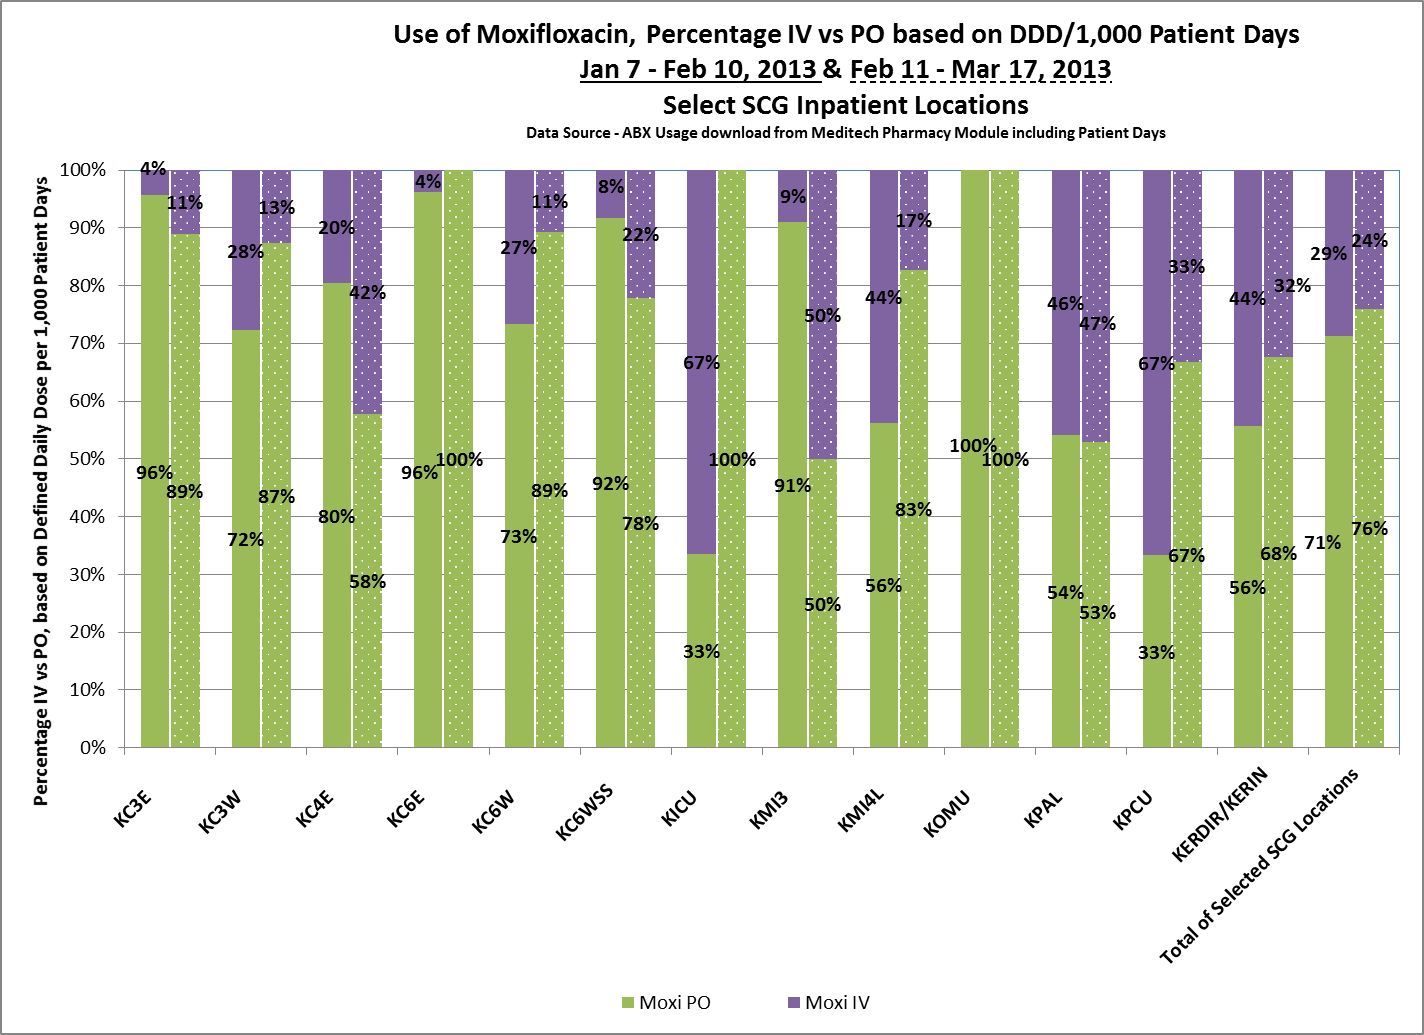
**

Supplement: ds3515.docx [file ds3515.docx]
